# Supplementary material for: Growth of Ba1−xSrxZrO3 (0 ≤ x ≤ 1) nanoparticles in supercritical water
Source: Royal Society of Chemistry journal article supplement (doi:10.1039/c6ra12288d), 2016-01-01
Supplement: c6ra12288d1.pdf [file c6ra12288d1.pdf]

(A)

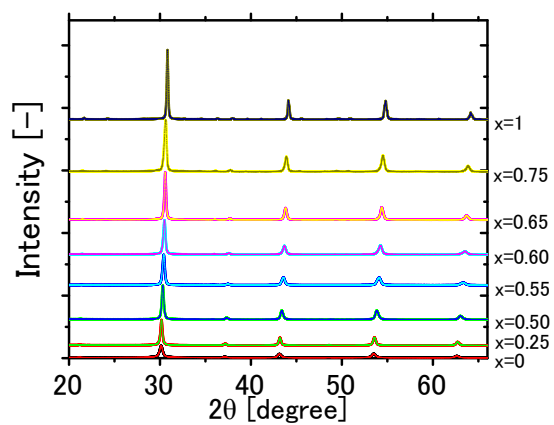

(B)

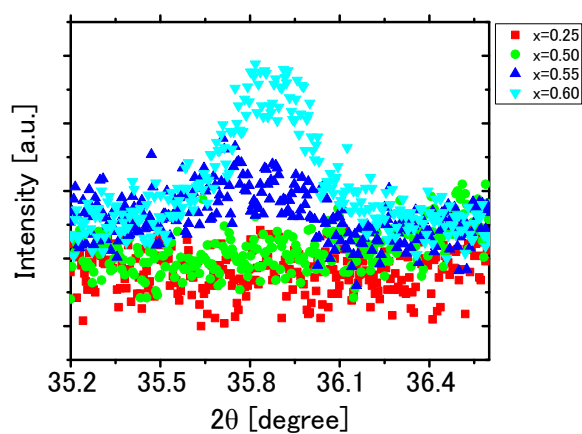

(C)

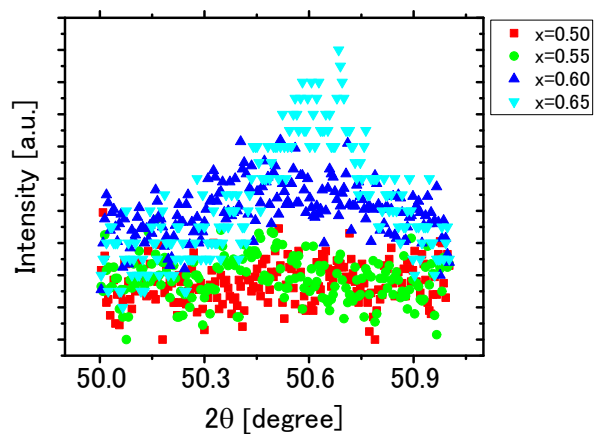

**Supplementary 1.** (A) XRD data for each  $x$  value; (B) extended XRD peaks around the phase change from Pm-3m to I4/mcm; (C) extended XRD peaks around the phase change from I4/mcm to Pnma
